# Supplementary material for: Biodegradation of Bisphenol A by Sphingobium sp. YC-JY1 and the Essential Role of Cytochrome P450 Monooxygenase
Source: PubMed Central journal article supplement (PMC7278973; doi:10.3390/ijms21103588), 2020-05-19
Supplement: ijms-21-03588-s001.pdf [file ijms-21-03588-s001.pdf]

## Supplementary data

### **Biodegradation of bisphenol A by *Sphingobium* sp. YC-JY1 and the essential role of cytochrome P450 monooxygenase**

Yang Jia<sup>1</sup>, Adel Eltoukhy<sup>1</sup>, Junhuan Wang<sup>1</sup>, Xianjun Li<sup>1</sup>, Thet Su Hlaing<sup>1</sup>, Mar Mar Aung<sup>1</sup>, May Thet Nwe<sup>1</sup>, Imane Lamraoui<sup>2</sup>, Yanchun Yan<sup>1,\*</sup>

<sup>1</sup> Graduate School, Chinese Academy of Agricultural Sciences, Beijing 100081, China

<sup>2</sup> Biotechnology Research Institute, Chinese Academy of Agricultural Sciences, Beijing 100081, China

\*Correspondence: Yanchun Yan

Email: [yanyanchun@caas.cn](mailto:yanyanchun@caas.cn)

Telephone: 010-82109685

## **Media**

Luria-Bertani (LB) medium consists of 10.0 g peptone, 5.0 g yeast extract, and 10.0 g NaCl in 1.0-liter deionized water. Trace element medium (TEM) was used for enrichment and purification of isolated bacteria, and it contained (per liter)  $(\text{NH}_4)_2\text{SO}_4$ , 2.0 g;  $\text{Na}_2\text{HPO}_4 \cdot 12\text{H}_2\text{O}$ , 1.5 g;  $\text{KH}_2\text{PO}_4$ , 1.5 g;  $\text{MgSO}_4 \cdot 7\text{H}_2\text{O}$ , 0.2 g;  $\text{CaCl}_2 \cdot 2\text{H}_2\text{O}$ , 0.01 g, and trace elements (mg/L):  $\text{FeSO}_4 \cdot 7\text{H}_2\text{O}$  (5),  $\text{ZnSO}_4 \cdot 7\text{H}_2\text{O}$  (0.22),  $\text{CuSO}_4 \cdot 5\text{H}_2\text{O}$  (0.03),  $\text{Na}_2\text{MoO}_4 \cdot 2\text{H}_2\text{O}$  (0.02),  $\text{MnSO}_4 \cdot 2\text{H}_2\text{O}$  (1.43),  $\text{CoSO}_4 \cdot 7\text{H}_2\text{O}$  (0.12),  $\text{Na}_2\text{WO}_4 \cdot 2\text{H}_2\text{O}$  (0.023).

## **Microbial identification using Biolog**

Isolated bacterium was identified using the Biolog GEN III MicroPlate protocol. The GEN III MicroPlate™ test panel provided a standardized micromethod using 94 biochemical tests. The cells were freshly regrown on LB plate in order to avoid the loss of viability and metabolic vigor which is typical of most organisms at stationary phase. Using inoculation fluid (IF), inoculums of each target cell were prepared with Protocols A (IF-A catalog no. 72401) and B (IF-B catalog no. 72402) at turbidity range of 95–98 % T.

An 8-channel automated pipettor was used to dispense 100  $\mu\text{L}$  of the suspension into each of the wells in the MicroPlate (Catalog no. 1030). The wells (Table S2) contain 71 carbon source utilization assays (columns 1–9) and 23 chemical sensitivity assays (columns 10–12); hence, they can be identified at the species levels based on the “Phenotypic Fingerprint” of the microorganisms provided by the test panel. These MicroPlates were placed in Omnilog reader, where they were read using Biolog’s Microbial Identification Systems software. Identified microbes were recorded.

## **Protein sequences**

>BisA sequence

MPHIQVTTTRDGEIRELDVAASGFLMEALRDANIDGVEAI**C**GGCCS**C**AT**C**HVYIDAAPAGT  
LPPVSSDEEMLLSGLVSTPGRSRLS**C**QIPVTAELDGLKLTIPPDS

Conserved cysteine residues are indicated by bold boxes.

>BisB sequence

MNPQTLPVFPDLDFISPEYACNREKYAARALRDYPLHFYKPLNMWIVSKHKDVRSAFTP  
QVFSSVAFGLLPPPDDIAPRVPDLYTDVHLPSMDPPEHTKLRVPVQQALLPGRLVGKDEVV  
RRIANELIDTFIDKGECDLLHDFS YKLALYLIVDMLGLPKERAEDYHRWSNCFQLFTP KV  
PERADARFFVPMPEEVL RQIWEDLAEANDYLREVVENLDRNPGNNMLS NLLQLREPDGS  
RTITISANVRNALEFGAAGHD**T**TATLIAHLTYFVLTPDLKDTLTEDPSLIPAAISETLRRRGS  
VDGLFRRTLSDVELCGQKIESGSIVYLDLTAANLDPDVFPEPETFRLNRDNIKEMVSGYG  
RHV**C**AGQYLSRIEAKAAYEELMRRIPNMRLADGFKLEYMPSVATTVLKGLPLVWDKN

The dashed line indicates the oxygen-binding region with a conserved threonine residue (bold box). The solid line indicates the heme-binding region, including the heme-binding cysteine residue (bold box).

**Table S1** Layout of assays for MicroPlate (GEN III)

|                                   |                                    |                                      |                                         |                                   |                                    |                                      |                                |                                |                           |                           |                            |
|-----------------------------------|------------------------------------|--------------------------------------|-----------------------------------------|-----------------------------------|------------------------------------|--------------------------------------|--------------------------------|--------------------------------|---------------------------|---------------------------|----------------------------|
| A1<br>Negative control            | A2<br>Dextrin                      | A3<br>D-Maltose                      | A4<br>D-Trehalose                       | A5<br>D-Celloblose                | A6<br>Gentiblose                   | A7<br>Sucrose                        | A8<br>D-Turanose               | A9<br>Stachyose                | A10<br>Positive control   | A11<br>pH 6               | A12<br>pH 5                |
| B1<br>D-Raffinose                 | B2<br>$\alpha$ -D-Lactose          | B3<br>D-Melibiose                    | B4<br>$\beta$ -Methyl-D-Glucoside       | B5<br>D-Salicin                   | B6<br>N-Acetyl-D-Glucosamine       | B7<br>N-Acetyl- $\beta$ -Mannosamine | B8<br>N-Acetyl-D-Galactosamine | B9<br>N-Acetyl Neuraminic acid | B10<br>1 % NaCl           | B11<br>4 % NaCl           | B12<br>6 % NaCl            |
| C1<br>$\alpha$ -D-Glucose         | C2<br>D-Mannose                    | C3<br>D-Fructose                     | C4<br>D-Galactose                       | C5<br>3-Methyl glucose            | C6<br>D-Fucose                     | C7<br>L-Fucose                       | C8<br>L-Rhamnose               | C9<br>Inosine                  | C10<br>1 % Sodium lactate | C11<br>Fusidic acid       | C12<br>D-Serine            |
| D1<br>D-Sorbitol                  | D2<br>D-Mannitol                   | D3<br>D-Arabitol                     | D4<br>Myo-inositol                      | D5<br>Glycerol                    | D6<br>D-Glucose-6- PO4             | D7<br>D-Fructose-6-PO4               | D8<br>D-Aspartic acid          | D9<br>D-Serine                 | D10<br>Troleandomycin     | D11<br>Rifamycin SV       | D12<br>Minocycline         |
| E1<br>Gelatin                     | E2<br>Glycl-L-Proline              | E3<br>L-Alanine                      | E4<br>L-Arginine                        | E5<br>L-Aspartic acid             | E6<br>L-Glutamic acid              | E7<br>L-Histidine                    | E8<br>L-Pyroglutamic acid      | E9<br>L-Serine                 | E10<br>Lincomycin         | E11<br>Guanidine HCl      | E12<br>Niaproof 4          |
| F1<br>Pectin                      | F2<br>D-Galacturonic acid          | F3<br>L-Galactonic acid lactone      | F4<br>D-Gluconic acid                   | F5<br>D-Glucuronic acid           | F6<br>Glucuronamide                | F7<br>Mucic acid                     | F8<br>Quinic acid              | F9<br>D-Saccharic acid         | F10<br>Vancomycin         | F11<br>Tetrazolium Violet | F12<br>Tetrazolium Blue    |
| G1<br>p-Hydroxy-Phenlyacetic Acid | G2<br>Methyl Pyruvate              | G3<br>D-Lactic acid methyl ester     | G4<br>L-Lactic acid                     | G5<br>Citric acid                 | G6<br>$\alpha$ -Keto-Glutaric acid | G7<br>D-Malic acid                   | G8<br>L-Malic acid             | G9<br>Bromo-Succinic acid      | G10<br>Nalidixic acid     | G11<br>Lithium Chloride   | G12<br>Potassium tellurite |
| H1<br>Tween 40                    | H2<br>$\gamma$ -Amino-Butyric acid | H3<br>$\alpha$ -Hydroxy-Butyric acid | H4<br>$\beta$ -Hydroxy-D,L Butyric acid | H5<br>$\alpha$ -Keto-Butyric acid | H6<br>Acetoacetic acid             | H7<br>Propionic acid                 | H8<br>Acetic acid              | H9<br>Formic acid              | H10<br>Aztreonam          | H11<br>Sodium butyrate    | H12<br>Sodium bromate      |

**Table S2** Strains, plasmids and primers used in this study

| Strains, plasmids and primers         | Description                                                                                                                                                     | Source      |
|---------------------------------------|-----------------------------------------------------------------------------------------------------------------------------------------------------------------|-------------|
| <b><i>Sphingobium</i> sp. strains</b> |                                                                                                                                                                 |             |
| YC-JY1                                | wild-type bisphenol A degrader; Nit <sup>r</sup> <sup>a</sup>                                                                                                   | this study  |
| YC-JY1Δ <i>bisdB</i>                  | YC-JY1 mutant with <i>bisdB</i> gene replaced with kanamycin resistance gene                                                                                    | this study  |
| <b><i>E. coli</i> strains</b>         |                                                                                                                                                                 |             |
| Trans1-T1                             | F <sup>-</sup> φ80( <i>lacZ</i> )ΔM15Δ <i>lacX74</i> <i>hsdR</i> (r <sub>k</sub> <sup>-</sup> , m <sub>k</sub> <sup>+</sup> )Δ <i>recA1398endA1tonA</i>         | TransGen    |
| BL21(DE3)                             | host strain for expression vectors; F <sup>-</sup> <i>ompT hsdS<sub>B</sub></i> (r <sub>B</sub> <sup>-</sup> m <sub>B</sub> <sup>-</sup> ) <i>gal dcm</i> (DE3) | Tiagen      |
| SM10λpir                              | donor strain for conjugation, thi thr leu tonA lacY supE recA::RP4-2-Tc::Mu                                                                                     | Zomanbio    |
| <b>plasmids</b>                       |                                                                                                                                                                 |             |
| pET28a(+)                             | expression vector; Kan <sup>r</sup> <sup>b</sup>                                                                                                                | Novagen     |
| pEX18Tc                               | gene knockout vector, <i>oriT</i> , <i>sacB</i> , Tc <sup>r</sup> <sup>c</sup>                                                                                  | Miaolingbio |
| pET28a- <i>bisdB</i>                  | pET-28a(+) derivative carrying <i>bisdB</i>                                                                                                                     | this study  |
| pET28a- <i>bisDAB</i>                 | pET-28a(+) derivative carrying <i>bisDA</i> and <i>bisDB</i>                                                                                                    | this study  |
| pEX18Tc- <i>bisdB</i>                 | pEX18Tc derivative carrying <i>bisdB</i>                                                                                                                        | this study  |
| <b>Primers</b>                        |                                                                                                                                                                 |             |
| 27F                                   | 5' - AGAGTTTGATCCTGGCTCAG-3'                                                                                                                                    | this study  |
| 1492R                                 | 5' - GGTTACCTTGTTACGACTT-3'                                                                                                                                     | this study  |
| <i>bisdB</i> -F                       | 5' -GCGCGAGCTCATGAACCCTCAGACACTGC-3' <sup>d</sup>                                                                                                               | this study  |
| <i>bisdB</i> -R                       | 5' -GCGCAAGCTTGTGTTTTGTCCCAGACCAGC-3'                                                                                                                           | this study  |
| <i>bisDAB</i> -F                      | 5' -GCGCGAGCTCATGCCTCATATCCAAGTGACT-3'                                                                                                                          | this study  |
| <i>bisDAB</i> -R                      | 5' -GCGCAAGCTTGTGTTTTGTCCCAGACCAGC-3'                                                                                                                           | this study  |
| <i>bisdBup</i> -F                     | 5' -GCTATGACCATGATTACGAAGATACTGATCAAGCCGGTGCG-3'                                                                                                                | this study  |
| <i>bisdBup</i> -R                     | 5' -CCCGTTGAATATGGCTCATGTTCCGATTCCCGCTC-3'                                                                                                                      | this study  |
| kan-F                                 | 5' -ATGAGCCATATTCAACGGGA-3'                                                                                                                                     | this study  |
| kan-R                                 | 5' -TTAGAAAACTCATCGAGCATCA-3'                                                                                                                                   | this study  |
| <i>bisDBdown</i> -F                   | 5' -TGATGCTCGATGAGTTTTTCTAAGCCGGGCTTCAAGTACCTG-3'                                                                                                               | this study  |
| <i>bisDBdown</i> -R                   | 5' -AACGACGGCCAGTGCCAGGAAGGCGAGTTTCCTATAG-3'                                                                                                                    | this study  |

<sup>a</sup> Nit<sup>r</sup>, nitrofurantoin resistant; <sup>b</sup> Kan<sup>r</sup>, kanamycin resistant; <sup>c</sup> Tc<sup>r</sup>, tetracycline resistant; <sup>d</sup> the restriction

sites in the primers (5'→3') are underlined.

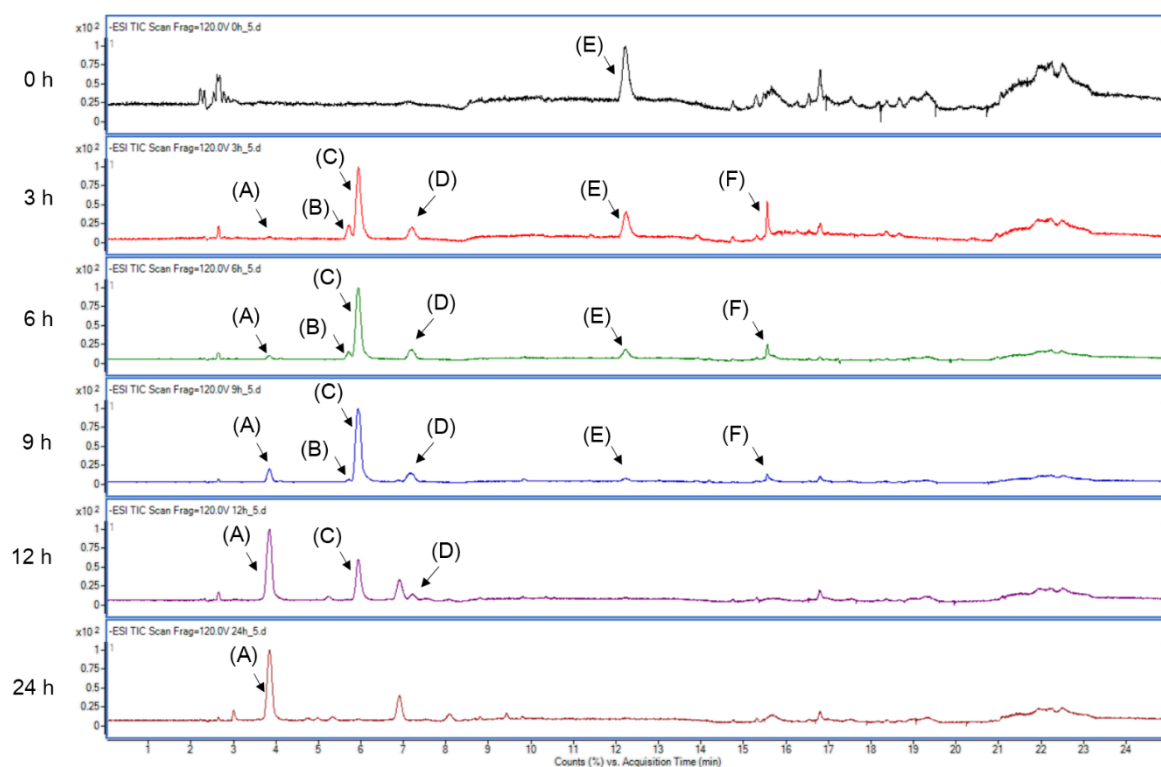

**Fig. S1.** HPLC-TOF-MS/MS chromatograms of intermediates during the biodegradation of BPA from 0 h to 24 h. The retention times of the identified peaks are 3.873 min (A), 5.709 min (B), 5.946 min (C), 7.203 min (D), 12.236 min (E), and 15.560 min (F).

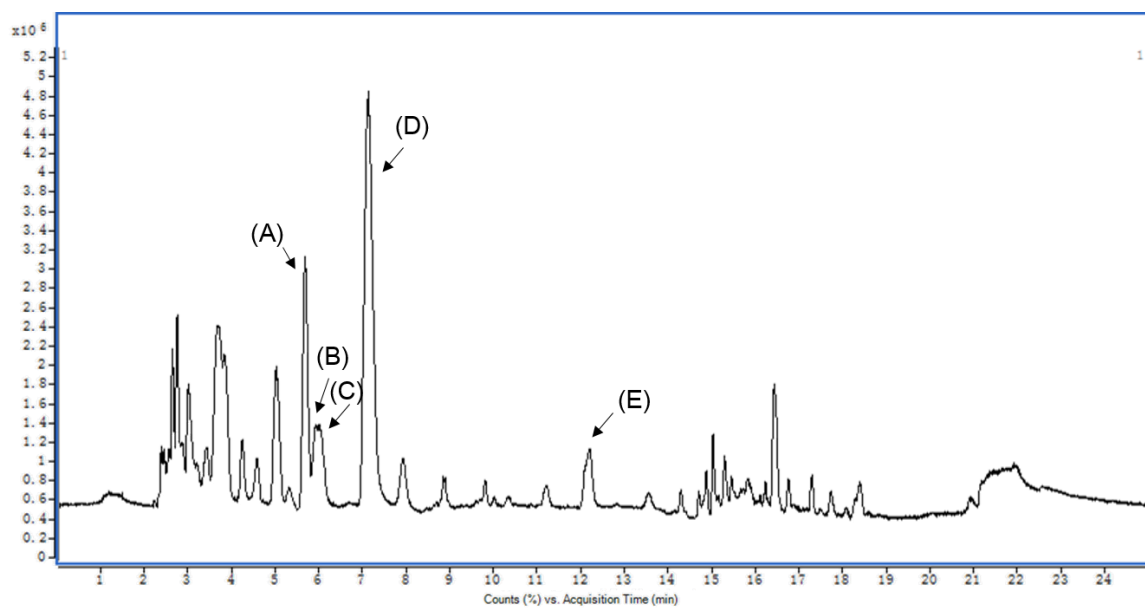

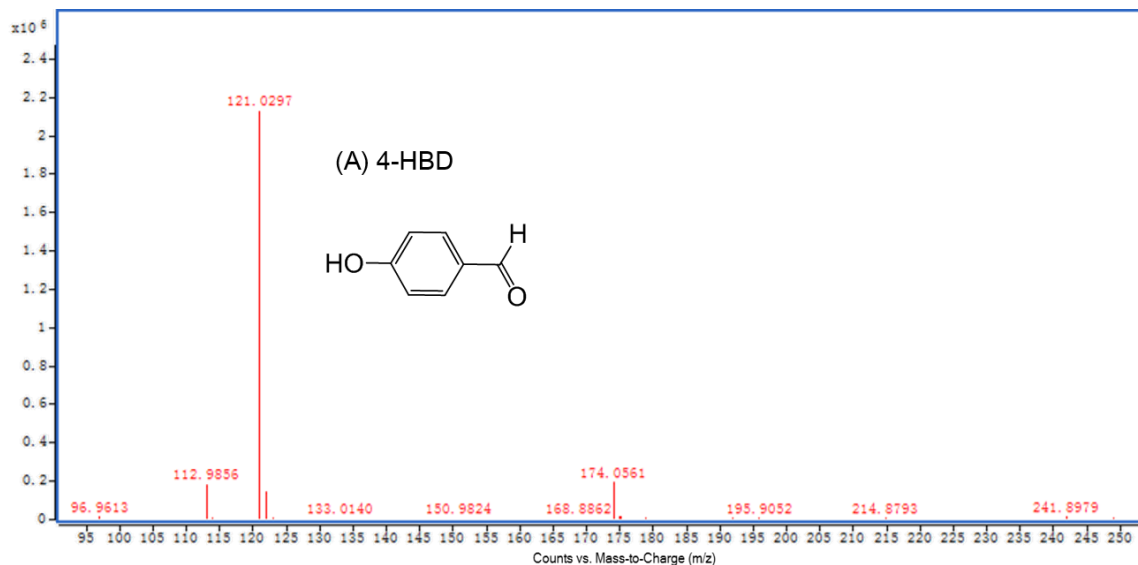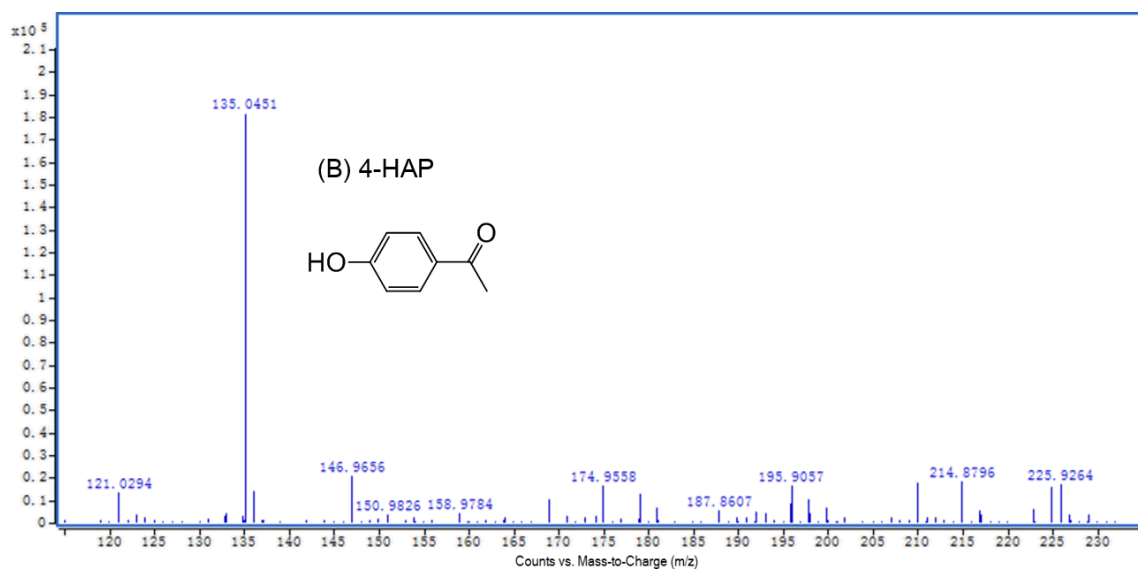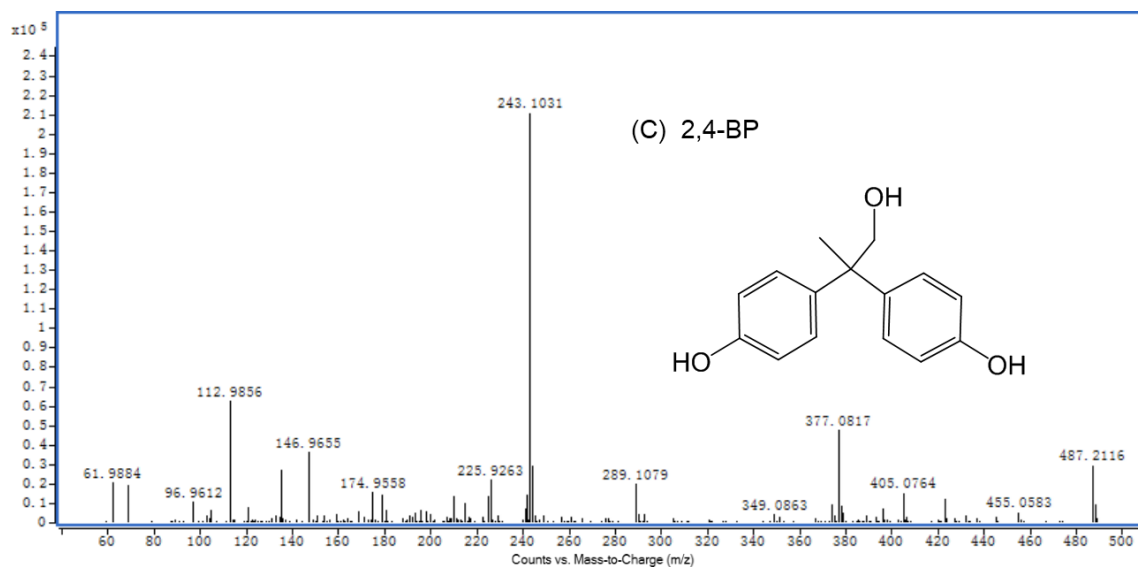

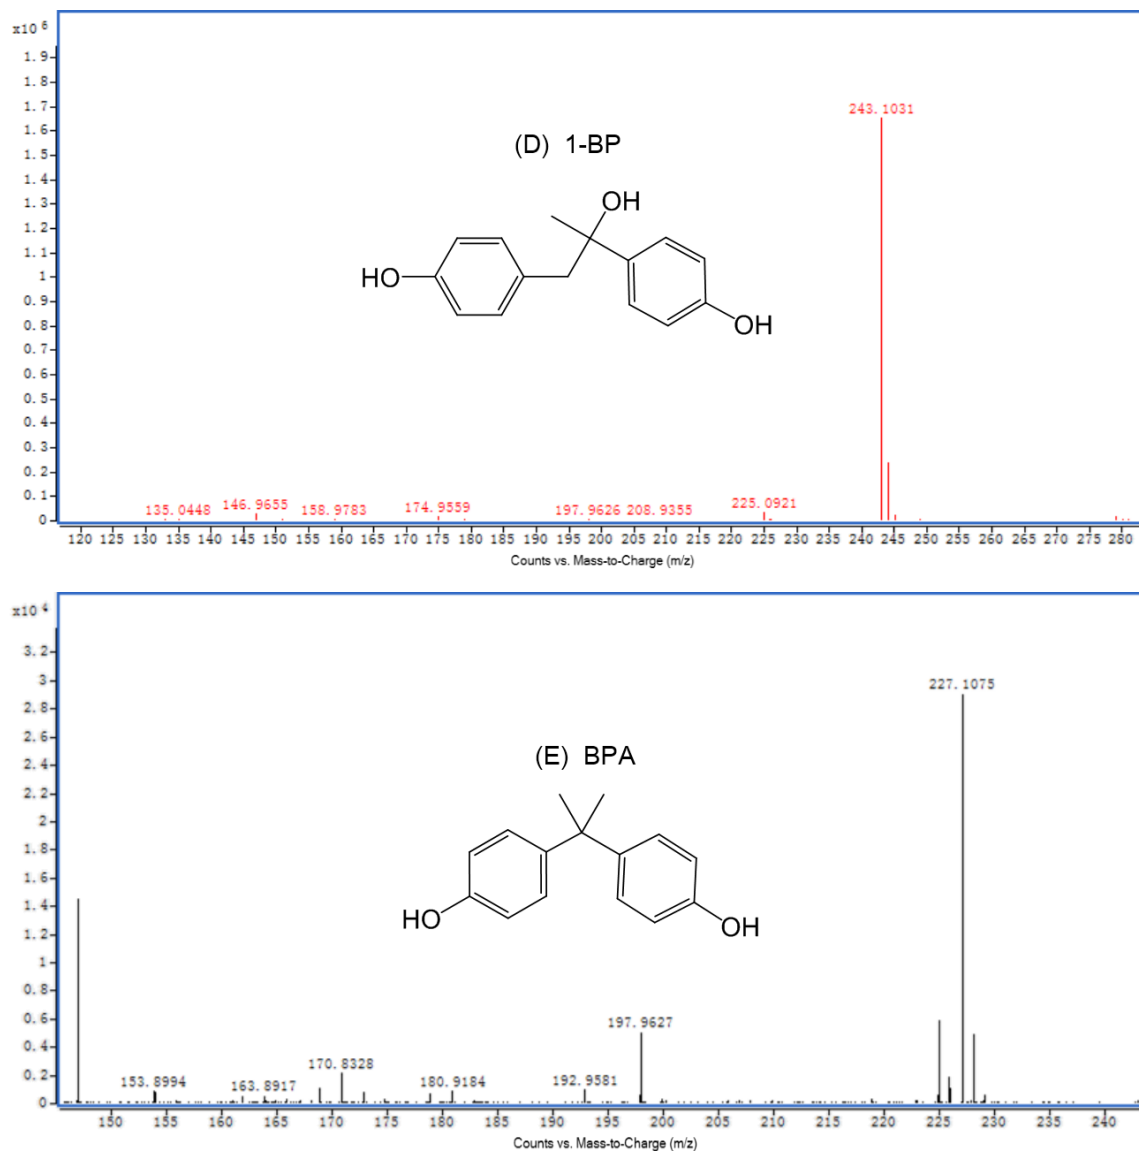

**Fig. S2.** The chromatogram and mass spectra of primary ions for BPA degradation by *E. coli* (pET28a-*bisdAB*) intermediates analyzed by HPLC-TOF-MS/MS.



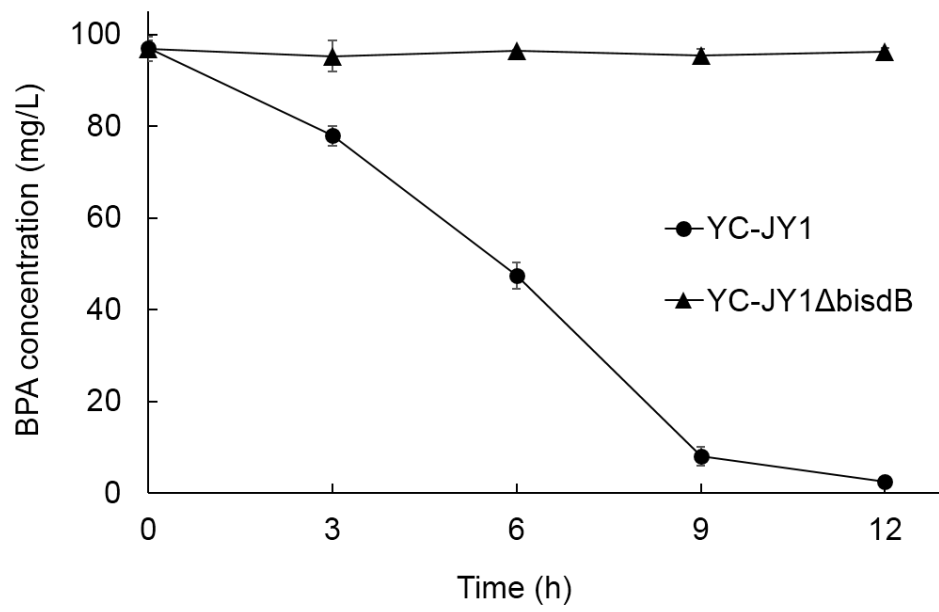

**Fig. S3.** BPA degradation by strain YC-JY1 and strain YC-JY1Δ*bisdB* in TEM medium.
